# Supplementary material
Source: PubMed Central journal article supplement (PMC5192980)
Supplement: PRO-26-122-s001.pdf [file PRO-26-122-s001.pdf]

## Two supporting figures

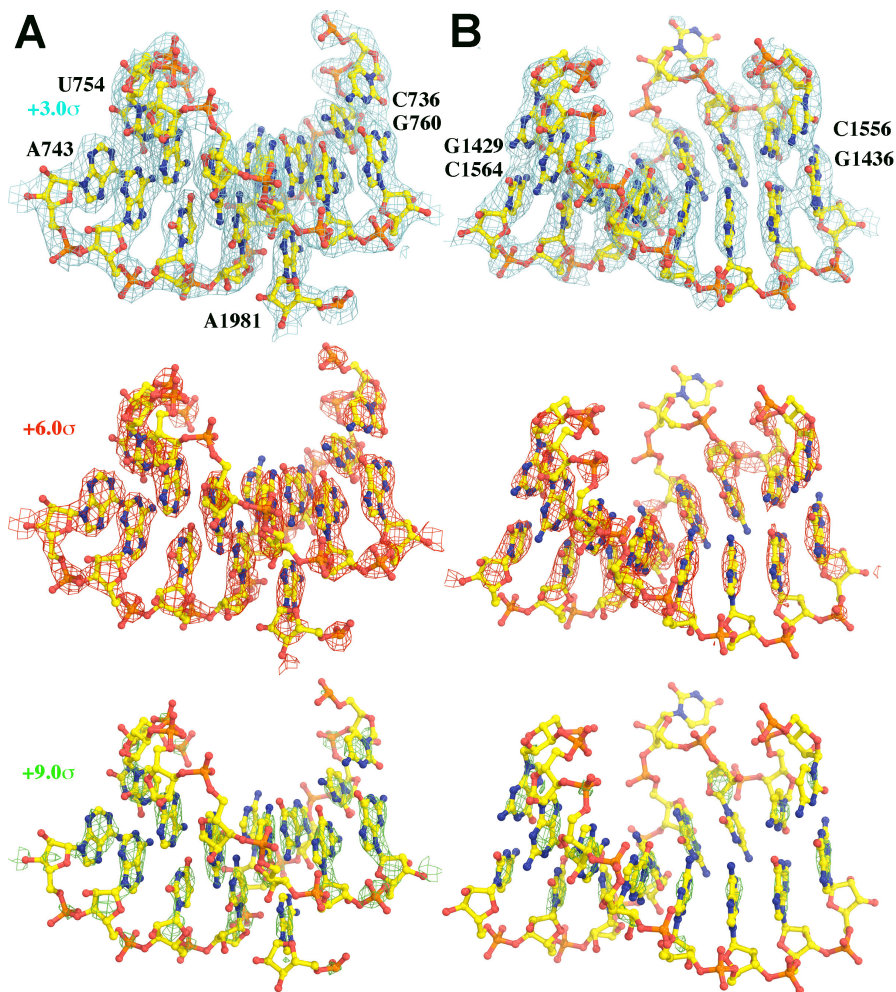

**Figure S1.** Experimental EP map reported for the structure of *E. coli* ribosome-EF-Tu complex contoured at +3.0 $\sigma$  (cyan, top), +6.0 $\sigma$  (red, middle), and +9.0 $\sigma$  (green, bottom) for the most ordered part (A) and a less ordered part (B) of the structure.

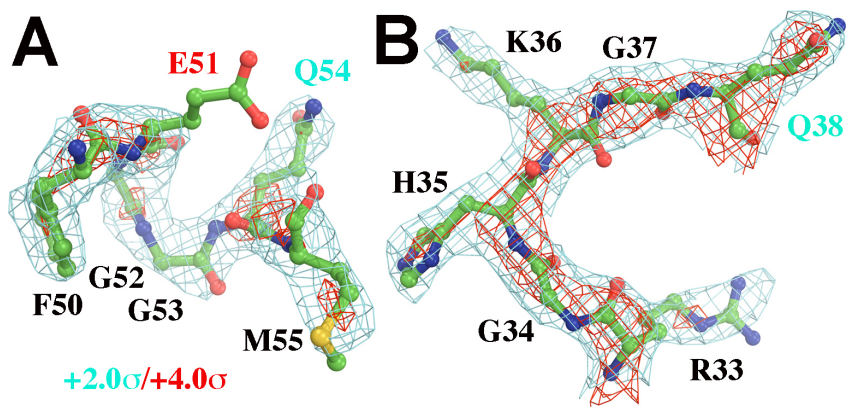

**Figure S2.** Experimental EP map reported for the structure of  $\beta$ -galactosidase contoured at +2.0 $\sigma$  (cyan) and +4.0 $\sigma$  (red). Gln residues are labeled in cyan and Glu residue is in red. (A) Residues F50-Q54. (B) Residues R33-Q38.
